# Supplementary material for: Molecular reframing of fibroblasts during resolution of arthritis
Source: Research Square preprint supplement (doi:10.21203/rs.3.rs-2668533/v1), 2023-03-21
Supplement: Supplementary file 1 [file 6f7765532baedec0d289dbfd.xlsx]

## Sheet: Suppl. Tab. 2 - ILC-removed-gen
mt-Nd1
mt-Nd2
mt-Co1
mt-Co2
mt-Atp8
mt-Atp6
mt-Co3
mt-Nd3
mt-Nd4l
mt-Nd4
mt-Nd5
mt-Nd6
mt-Cytb
Rpl7
Rpl31
Rpl37a
Rps6kc1
Rpl7a
Rpl12
Rpl35
Rps21
Rpl22l1
Rps3a1
Rps27
Rpl34
Rps20
Rps6
Rps8
Rps6ka1
Rpl11
Rpl22
Rpl9
Rpl5
Rplp0
Rpl6
Rpl21
Rpl32
Rps9
Rpl28
Rps5
Rps19
Rps16
Rps11
Rpl13a
Rpl18
Rps17
Rps3
Rpl27a
Rps13
Rps15a
Rplp2
Rpl18a
Rpl13
Rps25
Rpl10-ps3
Rplp1
Rpl4
Rps27l
Rpl29
Rps27rt
Rpsa
Rpl14
Rps12
Rps15
Rpl41
Rps26
Rps27a
Rpl26
Rpl23a
Rps6kb1
Rpl23
Rpl19
Rpl27
Rpl38
Rps7
Rps29
Rpl36al
Rps6ka5
Rps23
Rpl15
Rps24
Rpl36a-ps1
Rpl37
Rpl30
Rpl8
Rpl3
Rps19bp1
Rpl39l
Rpl35a
Rpl24
Rps6ka2
Rps2
Rps10
Rpl10a
Rps28
Rps18
Rpl7l1
Rpl36
Rps14
Rpl17
Rps6kb2
Rpl9-ps6
Rpl39
Rpl10
Rps4x
Rpl36a
Rps6ka3
Iglon5
Igha
Ighd
Ighm
Iglc1
Iglc3
Iglc2
Ighmbp2
A430018G15Rik
A430005L14Rik
A430072P03Rik
A430073D23Rik
A430033K04Rik
A430035B10Rik
A430078I02Rik
A430090L17Rik
A430057M04Rik
A430088P11Rik
A430093F15Rik
Gm26901
Gm28836
Gm26788
Gm37233
Gm28417
Gm38336
Gm38115
Gm16152
Gm15832
Gm16894
Gm8251
Gm28151
Gm17767
Gm29670
Gm15834
Gm973
Gm11579
Gm20342
Gm29112
Gm28112
Gm29358
Gm29055
Gm29336
Gm7967
Gm28187
Gm28404
Gm7160
Gm27184
Gm26686
Gm29488
Gm38394
Gm15445
Gm37552
Gm19705
Gm4258
Gm26930
Gm29170
Gm10138
Gm28791
Gm2000
Gm37294
Gm37529
Gm37328
Gm37083
Gm37634
Gm38190
Gm37864
Gm16565
Gm37469
Gm15853
Gm16701.1
Gm37748
Gm26620
Gm20045
Gm10521
Gm37065
Gm37756
Gm37214
Gm26670
Gm26879
Gm45902
Gm13185
Gm36988
Gm13218
Gm10851
Gm13375
Gm13421
Gm13448
Gm13522
Gm13546
Gm13594
Gm13625
Gm13686
Gm13684
Gm10804
Gm13889
Gm27003
Gm10762
Gm14029
Gm14023
Gm10130
Gm14167
Gm14154
Gm14168
Gm14286
Gm16751
Gm14302
Gm14320
Gm14275
Gm14455
Gm20721
Gm14393
Gm14399
Gm14391
Gm4631
Gm4724
Gm6710
Gm2026
Gm14308
Gm14305
Gm14295
Gm14296
Gm14419
Gm14410
Gm14418
Gm14403
Gm14322
Gm14325
Gm14327
Gm14326
Gm8797
Gm9833
Gm43672
Gm15952
Gm12534
Gm5148
Gm42921
Gm37170
Gm37035
Gm37305
Gm43714
Gm17146
Gm15417
Gm42809
Gm9774
Gm36070
Gm38411
Gm42463
Gm43773
Gm43774
Gm43768
Gm15265
Gm16740
Gm17690
Gm15444
Gm20632
Gm20633
Gm20627
Gm20628
Gm42743
Gm15441
Gm5544
Gm43024
Gm42717
Gm43466
Gm42869
Gm43462
Gm43463
Gm43465
Gm42939
Gm42937
Gm42941
Gm43062
Gm43061
Gm43149
Gm43387
Gm15472
Gm43065
Gm42696
Gm42700
Gm42699
Gm42702
Gm42701
Gm43258
Gm43259
Gm43260
Gm43256
Gm43696
Gm43581
Gm42658
Gm42659
Gm43848
Gm43328
Gm43329
Gm43330
Gm43331
Gm5547
Gm42722
Gm42721
Gm43221
Gm19391
Gm9889
Gm42893
Gm42664
Gm17494
Gm43653
Gm42997
Gm36520
Gm43254
Gm30648
Gm31243
Gm43403
Gm40155
Gm43689
Gm43445
Gm43707
Gm43560
Gm11808
Gm12367
Gm26881
Gm12454
Gm16731
Gm26566
Gm49890
Gm12648
Gm12655
Gm12802
Gm12737
Gm12743
Gm17354
Gm12840
Gm12898
Gm12905
Gm12940
Gm12976
Gm12971
Gm12992
Gm28874
Gm17300
Gm12981
Gm16225
Gm24362
Gm13012
Gm16287
Gm13031
Gm13075
Gm13212
Gm13166
Gm20707
Gm13205
Gm13091
Gm27200
Gm16023
Gm16008
Gm17590
Gm42435
Gm43017
Gm43031
Gm43112
Gm43113
Gm43111
Gm10484
Gm43728
Gm8773
Gm5106
Gm43566
Gm26648
Gm5129
Gm19409
Gm9970
Gm43660
Gm15614
Gm9903
Gm1673
Gm1043
Gm42555
Gm43042
Gm20033
Gm42726
Gm42670
Gm17207
Gm19590
Gm7467
Gm43057
Gm9958
Gm8013
Gm9484
Gm16226
Gm17092
Gm43514
Gm32051
Gm28050
Gm26692
Gm26779
Gm15446
Gm17655
Gm35315
Gm15787
Gm43138
Gm43137
Gm42595
Gm17122
Gm10401
Gm13840
Gm14508
Gm13842
Gm42918
Gm16552
Gm42829
Gm15860
Gm15747
Gm43813
Gm34086
Gm16001
Gm10382
Gm42500
Gm15903
Gm6598
Gm10369
Gm36266
Gm15672
Gm43703
Gm43378
Gm15708
Gm43625
Gm15411
Gm43332
Gm42529
Gm42531
Gm43598
Gm43597
Gm43807
Gm20559
Gm15473
Gm4876
Gm20186
Gm27019
Gm49041
Gm10244
Gm16630
Gm44226
Gm15527
Gm44175
Gm45051
Gm20536
Gm15402
Gm26640
Gm43920
Gm19265
Gm44091
Gm44210
Gm44265
Gm20705
Gm44040
Gm17055
Gm44081
Gm15492
Gm26982
Gm20692
Gm44148
Gm26826
Gm28809
Gm43126
Gm10069
Gm44066
Gm44067
Gm15987
Gm38910
Gm15706
Gm21814
Gm15927
Gm14548
Gm15873
Gm15510
Gm36371
Gm45509
Gm42372
Gm26802
Gm26852
Gm16174
Gm4598
Gm9844
Gm38973
Gm44702
Gm44699
Gm38979
Gm26810
Gm26935
Gm4673
Gm12758
Gm12764
Gm44836
Gm37494
Gm15545
Gm31597
Gm45311
Gm45309
Gm32031
Gm45235
Gm34121
Gm44686
Gm21269
Gm44851
Gm15880
Gm16638
Gm44751
Gm26981
Gm45188
Gm45187
Gm10605
Gm15635
Gm38405
Gm45620
Gm35363
Gm10602
Gm15133
Gm45885
Gm4070
Gm44777
Gm45151
Gm20274
Gm45847
Gm31749
Gm45184
Gm15503
Gm10584
Gm16201
Gm10575
Gm16982
Gm45231
Gm5608
Gm16350
Gm17491
Gm16933
Gm45570
Gm45250
Gm26632
Gm26978
Gm9951
Gm10131
Gm29243
Gm6213
Gm16675
Gm15991
Gm11175
Gm3336
Gm26586
Gm16091
Gm10282
Gm17435
Gm45406
Gm4890
Gm9725
Gm10643
Gm26532
Gm42031
Gm39214
Gm10638
Gm45464
Gm15890
Gm45767
Gm5914
Gm15655
Gm45733
Gm45833
Gm20406
Gm42047
Gm45894
Gm4316
Gm45890
Gm26759
Gm31718
Gm32856
Gm47079
Gm16754
Gm16853
Gm26511
Gm16845
Gm47772
Gm48796
Gm27162
Gm16214
Gm30373
Gm10688
Gm39323
Gm26737
Gm48604
Gm47204
Gm47230
Gm39326
Gm10684
Gm16536
Gm48529
Gm5617
Gm47828
Gm16124
Gm29322
Gm10658
Gm26631
Gm20275
Gm5122
Gm10655
Gm48855
Gm17749
Gm28379
Gm15511
Gm28731
Gm10642
Gm27241
Gm34829
Gm17324
Gm17477
Gm26907
Gm28229
Gm10634
Gm29562
Gm28424
Gm16794
Gm19325
Gm16185
Gm1123
Gm37612
Gm17041
Gm34106
Gm9917
Gm37850
Gm37401
Gm38163
Gm9888
Gm26614
Gm2449
Gm47112
Gm47121
Gm9856
Gm17021
Gm39469
Gm21781
Gm16153
Gm30906
Gm47761
Gm10827
Gm48545
Gm20139
Gm33104
Gm26740
Gm36172
Gm46218
Gm20300
Gm48045
Gm47512
Gm16364.1
Gm34006
Gm48671
Gm9803
Gm46224
Gm47644
Gm47917
Gm16998
Gm48086
Gm47257
Gm26789
Gm31763
Gm10941
Gm30122
Gm47015
Gm29093
Gm49322
Gm16104
Gm3055
Gm32687
Gm4924
Gm17249
Gm17745
Gm48882
Gm47599
Gm48427
Gm48768
Gm34921
Gm34983
Gm15663
Gm15910
Gm48591
Gm4129
Gm20492
Gm4189
Gm16230
Gm47438
Gm29585
Gm11973
Gm11998
Gm11999
Gm12166
Gm16033
Gm12184
Gm12185
Gm12195
Gm26542
Gm12204
Gm12207
Gm12214
Gm12216
Gm12258
Gm16062
Gm45605
Gm26964
Gm12278
Gm12316
Gm19967
Gm45606
Gm10392
Gm11205
Gm11423
Gm20234
Gm11491
Gm15892
Gm45716
Gm11532
Gm11613
Gm12359
Gm11551
Gm11639
Gm11713
Gm11714
Gm11696
Gm11767
Gm11769
Gm28192
Gm26520
Gm48610
Gm48678
Gm48619
Gm5784
Gm49700
Gm30124
Gm49586
Gm4419
Gm36287
Gm47705
Gm36723
Gm48236
Gm48617
Gm17056
Gm17024
Gm7008
Gm15902
Gm17529
Gm527
Gm9887
Gm15283
Gm47689
Gm10451
Gm48226
Gm48780
Gm30025
Gm47941
Gm20337
Gm29361
Gm47447
Gm47484
Gm47863
Gm6566
Gm47439
Gm47566
Gm20682
Gm19951
Gm36756
Gm20069
Gm47167
Gm28875
Gm46378
Gm19605
Gm48286
Gm11027
Gm48079
Gm49602
Gm36423
Gm47802
Gm48027
Gm32036
Gm47664
Gm46404
Gm11361
Gm48161
Gm29675
Gm47662
Gm6093
Gm47127
Gm36839
Gm48708
Gm31683
Gm32401
Gm28707
Gm48623
Gm48357
Gm48194
Gm34961
Gm3604
Gm49359
Gm5141
Gm16133
Gm16132
Gm47123
Gm36445
Gm10767
Gm28557
Gm17108
Gm15912
Gm47469
Gm46430
Gm48302
Gm17259
Gm49223
Gm9776
Gm48420
Gm20075
Gm6169
Gm10260
Gm9828
Gm9465
Gm47551
Gm15327
Gm15326
Gm10734
Gm17509
Gm21188
Gm21762
Gm3636
Gm16741
Gm3839
Gm11100
Gm47794
Gm47798
Gm48321
Gm2237
Gm48283
Gm30054
Gm30108
Gm31392
Gm26660
Gm47920
Gm46447
Gm48914
Gm49032
Gm7324
Gm17173
Gm15601
Gm10101
Gm10371
Gm35166
Gm26782
Gm43647
Gm43305
Gm10366
Gm29776
Gm49747
Gm16973
Gm49336
Gm27010
Gm26916
Gm27017
Gm5464
Gm16867
Gm49164
Gm4285
Gm10845
Gm17066
Gm10076
Gm49179
Gm2245
Gm49207
Gm49216
Gm48960
Gm26766
Gm49085
Gm49077
Gm34794
Gm16006
Gm29394
Gm20712
Gm2682
Gm38563
Gm26621
Gm49066
Gm39556
Gm28068
Gm35339
Gm17638
Gm36738
Gm16575
Gm16576
Gm49512
Gm20324
Gm49463
Gm29666
Gm49539
Gm20621
Gm26760
Gm17546
Gm32885
Gm26513
Gm17058
Gm49494
Gm5475
Gm35853
Gm9918
Gm49479
Gm49504
Gm15879
Gm15859
Gm16861
Gm15983
Gm41414
Gm26822
Gm9961
Gm49785
Gm15764
Gm31814
Gm49756
Gm46565
Gm15743
Gm49733
Gm34680
Gm15829
Gm17103
Gm9968
Gm49735
Gm4737
Gm15518
Gm21833
Gm49708
Gm15965
Gm49625
Gm10785
Gm16310
Gm15340
Gm49797
Gm49719
Gm3448
Gm3435
Gm5165
Gm6712
Gm7072
Gm50071
Gm34455
Gm26724
Gm10505
Gm49794
Gm49774
Gm49741
Gm15420
Gm49801
Gm49874
Gm49838
Gm22146
Gm20109
Gm4356
Gm49864
Gm16196
Gm50068
Gm36486
Gm26885
Gm50250
Gm50240
Gm50103
Gm50105
Gm50107
Gm17276
Gm26549
Gm17251
Gm19412
Gm50335
Gm10501
Gm20522
Gm11131
Gm16279
Gm19684
Gm26917
Gm42418
Gm19585
Gm49915
Gm20219
Gm11110
Gm17133
Gm49870
Gm26510
Gm4707
Gm26749
Gm32282
Gm50012
Gm10184
Gm1976
Gm20939
Gm6225
Gm50023
Gm10125
Gm28529
Gm9993
Gm50069
Gm15956
Gm2629
Gm49980
Gm26533
Gm29994
Gm15337
Gm4013
Gm16283
Gm4221
Gm9949
Gm50228
Gm50169
Gm26910
Gm41764
Gm6133
Gm16286
Gm50211
Gm46620
Gm16146
Gm45871
Gm36608
Gm17552
Gm50203
Gm42067
Gm14963
Gm14966
Gm17227
Gm50232
Gm10353
Gm50340
Gm10802
Gm28935
Gm8369
Gm5244
Gm50341
Gm10053
Gm9895
Gm36043
Gm50210
Gm47735
Gm50217
Gm35867
Gm17018
Gm50196
Gm50431
Gm19557
Gm50358
Gm30541
Gm50394
Gm16299
Gm14634
Gm14636
Gm14718
Gm14698
Gm15063
Gm614
Gm5127
Gm6377
Gm15232
Gm15261
Gm15247
Gm21887
Gm21860
Gm47283
Scgb1a1
Jchain
Igkc
Malat1
Xist
Mid1
Kcnq1ot1
AC149090.1
Hspd1
Hspe1
Hspa14
Hspa5
Hspa4l
Hspb11
Hspg2
Hspb1
Hsph1
Hspbp1
Hspb6
Hspa8
Hsp90b1
Hspa4
Hspa2
Hsp90aa1
Hspbap1
Hspa13
Hspa1b
Hspa1a
Hsp90ab1
Hspa9
Hspe1-rs1
Hspa12a
