# Supplementary material for: Molecular reframing of fibroblasts during resolution of arthritis
Source: Research Square preprint supplement (doi:10.21203/rs.3.rs-2668533/v1), 2023-03-21
Supplement: Supplementary file 2 [file 982e5fdda8cc8744dc2383d0.xlsx]

## Sheet: Suppl. Tab. 3 - GSEA-terms
	name	database	ID	genes
1	arthritis	KEGG	mmu05323	Cd80, Cd86, Cd28, Ctla4, H2-Aa, H2-Ab1, H2-Eb1, H2-DMa, H2-DMb1, H2-DMb2, H2-Oa, H2-Ob, H2-Ea, H2-Eb2, Itgal, Itgb2, Itgb2l, Icam1, Il15, Tnfsf13, Tnfsf13b, Ltb, Tnf, Il1a, Il1b, Il6, Il11, Il18, Tlr2, Tlr4, Jun, Fos, Tgfb1, Tgfb2, Tgfb3, Il23a, Il17a, Pth, Csf1, Tnfsf11, Tnfrsf11a, Atp6v1a, Atp6v1b2, Atp6v1b1, Atp6v1c1, Atp6v1c2, Atp6v1d, Atp6v1e1, Atp6v1e2, Atp6v1f, Atp6v1g2, Atp6v1g1, Atp6v1g3…
2	prostaglandin secretion	GOBP	GO:0032308	Edn1, Il1a, Il1b, Map2k6, Mapk9, Mif, Oxt, P2rx7, P2ry2, Pla2g3, Pla2g4a, Pla2g10, Ptges, Tnfrsf11a, Tnfsf11
3	pos. reg. osteoclasts diff.	GOBP	GO:0045672	Asxl2, Car2, Ccl3, Ccl5, Ccl9, Ccr1, Ccr1l1, Creb1, Csf1, Csf1r, Dlk1, Fos, Gnas, Gpr68, Gsk3b, Ifng, Il12b, Il17a, Il20, Il23a, Itgb3, Klf10, Nedd9, Ninj1, Notch2, Ocstamp, Pou4f1, Pou4f2, Ppargc1b, Ppp3ca, Slc9b2, Tmem64, Tnf, Tnfsf11, Traf6, Trem2, Tyrobp
4	monocyte chemotaxis	GOBP	GO:0002548	Aif1, Ano6, Anxa1, App, Ccl1, Ccl2, Ccl3, Ccl4, Ccl5, Ccl6, Ccl7, Ccl8, Ccl9, Ccl11, Ccl12, Ccl17, Ccl19, Ccl20, Ccl21a, Ccl21b, Ccl21c, Ccl22, Ccl24, Ccl25, Ccl26, Ccn3, Ccr1, Ccr1l1, Ccr2, Creb3, Ctsg, Cx3cl1, Cx3cr1, Cxcl10, Cxcl12, Cxcl17, Defb25, Dusp1, Flt1, Grem1, Hmgb1, Lgals3, Lgmn, Lyn, Mospd2, Msmp, Myo9b, Nbl1, Ninj1, Pdgfb, Pla2g7, Ptpro, Rps19, S100a14, Serpine1, Slamf8, Slit2, Tnfs…
5	collagen degradation	GOBP	GO:0030574	Adam15, Adamts2, Cst3, Ctsb, Ctsk, Ctsl, Ctss, Fap, Idua, Itgb1, Mmp1b, Mmp2, Mmp3, Mmp7, Mmp8, Mmp9, Mmp10, Mmp11, Mmp12, Mmp13, Mmp14, Mmp15, Mmp16, Mmp17, Mmp19, Mmp20, Mmp21, Mmp23, Mmp24, Mmp25, Mmp27, Mmp28, Mrc2, Pepd, Prtn3, Retreg1, Retreg2, Retreg3, Vsir
6	response to TNF	GOBP	GO:0071356	Acod1, Actn4, Actr3, Adam17, Adamts7, Adamts12, Adipoq, Aim2, Akt1, Ankrd1, Apoa1, Asah1, Bag4, Birc2, Birc3, Birc7, Brca1, Cactin, Card14, Casp1, Ccdc3, Ccl1, Ccl2, Ccl3, Ccl4, Ccl5, Ccl6, Ccl7, Ccl8, Ccl9, Ccl11, Ccl12, Ccl17, Ccl19, Ccl20, Ccl21a, Ccl21b, Ccl21c, Ccl22, Ccl24, Ccl25, Ccl26, Cd40, Cd70, Cdip1, Cebpa, Cfl1, Chuk, Cib1, Cldn18, Commd7, Cpne1, Crhbp, Cx3cl1, Cyld, Dab2ip, Dbn1, Dc…
7	inflammatory response	GOBP	GO:0006954	Abcc1, Abcd1, Abcd2, Abhd12, Abi3bp, Abr, Ace, Acer3, Ackr1, Ackr2, Acod1, Acp5, Acvr1, Ada, Adam8, Adam17, Adamts12, Adcy1, Adcy7, Adcy8, Adcyap1, Adipoq, Adora1, Adora2a, Adora2b, Adora3, Adra2a, Adrb2, Afap1l2, Ager, Agr2, Agt, Agtr1a, Agtr1b, Agtr2, Ahcy, Ahcyl, Ahsg, Aif1, Aim2, Aimp1, Ak7, Akna, Akt1, Aldh2, Alox5, Alox5ap, Alox15, Ankrd42, Ano6, Anxa1, Aoah, Aoc3, Ap3b1, Apoa1, Apod, Apoe,…
8	leukocyte chemotaxis	GOBP	GO:0030595	Adam8, Adam10, Adam17, Aif1, Akirin1, Alox5, Ano6, Anxa1, App, Arhgef5, Bsg, Bst1, C1qbp, C3ar1, C5ar1, C5ar2, Calr, Camk1d, Ccl1, Ccl2, Ccl3, Ccl4, Ccl5, Ccl6, Ccl7, Ccl8, Ccl9, Ccl11, Ccl12, Ccl17, Ccl19, Ccl20, Ccl21a, Ccl21b, Ccl21c, Ccl21d, Ccl22, Ccl24, Ccl25, Ccl26, Ccl27a, Ccn3, Ccr1, Ccr1l1, Ccr2, Ccr3, Ccr6, Ccr7, Cd74, Ch25h, Chga, Cklf, Cmklr1, Cnr2, Coro1a, Creb3, Csf1, Csf1r, Csf3r,…
9	neutrophil chemotaxis	GOBP	GO:0030593	Bsg, Bst1, C1qbp, C3ar1, C5ar1, C5ar2, Camk1d, Ccl1, Ccl2, Ccl3, Ccl4, Ccl5, Ccl6, Ccl7, Ccl8, Ccl9, Ccl11, Ccl12, Ccl17, Ccl19, Ccl20, Ccl21a, Ccl21b, Ccl21c, Ccl21d, Ccl22, Ccl24, Ccl25, Ccl26, Ccr7, Cd74, Cklf, Csf3r, Cx3cl1, Cxadr, Cxcl1, Cxcl2, Cxcl3, Cxcl5, Cxcl9, Cxcl10, Cxcl13, Cxcl15, Cxcr1, Cxcr2, Dapk2, Dnm1l, Dpep1, Dpp4, Dysf, Edn1, Edn2, Edn3, Ednra, Fcer1g, Fcgr3, Gbf1, Gm5849, Ifn…
10	Il17 signlaing pathway	KEGG	mmu04657	Il25, Il17ra, Il17rb, Tradd, Fadd, Casp3, Casp8, Traf3ip2, Traf6, Nfkb1, Rela, Fos, Fosb, Jun, Jund, Fosl1, Il4, Il5, Il13, Ccl17, Ccl11, Il17a, Il17f, Il17rc, Traf3, Anapc5, Tnfaip3, Hsp90aa1, Hsp90ab1, Hsp90b1, Tbk1, Tab2, Tab3, Map3k7, Ikbkg, Chuk, Ikbkb, Nfkbia, Mapk14, Mapk11, Mapk12, Mapk13, Mapk8, Mapk9, Mapk10, Mapk1, Mapk3, Mapk4, Mapk6, Mapk7, Mapk15, Cebpb, Traf4, Ikbke, Usp25, Traf5, …
11	up regulation of inflammatory response	GOBP	GO:0050729	Abcc1, Ace, Adam8, Adora2b, Adora3, Ager, Aim2, Alox5ap, Aoc3, App, Btk, C2cd4a, C2cd4b, C3, Camk2n1, Casp1, Casp4, Ccl1, Ccl3, Ccl5, Ccl24, Ccn4, Ccr2, Ccr5, Ccr7, Cd24a, Cd28, Cd47, Cd81, Cdk19, Cebpa, Cebpb, Clock, Cnr1, Csf1r, Ctsc, Ctss, Ddt, Dhx9, Ednra, Egfr, Ets1, Fabp4, Fcer1a, Fcer1g, Fcgr1, Fcgr3, Fem1a, Ffar2, Ffar3, Fgfr1, Gpr4, Gprc5b, Gpsm3, Grn, Hspd1, Hyal2, Ido1, Ifi35, Ifng, Ig…
12	anti-inflammatory response	GOBP	GO:0050728	Abr, Acod1, Acp5, Ada, Adcyap1, Adipoq, Adora1, Adora2a, Adrb2, Alox5, Aoah, Apoa1, Apoe, Ash1l, Bcr, C1qtnf3, C1qtnf12, Calcrl, Ccn3, Cd24a, Cd44, Cd200, Cd200l1, Cd200l2, Cd200r1, Cd276, Cdh5, Chrna7, Cnr2, Cst7, Ctla2a, Cx3cl1, Cx3cr1, Cxcl17, Cyld, Cyp19a1, Dusp10, Elf4, Enpp3, Ets1, Fcgr2b, Fem1a, Fem1al, Ffar4, Fndc4, Foxf1, Foxp3, Gata3, Ghrl, Ghsr, Git1, Gper1, Gpr17, Gpr31b, Gps2, Gpx1, …
13	neg. reg. osteoclasts diff.	GOBP	GO:0045671	Cartpt, Ceacam1, Cldn18, Clec2d, Clec2g, Clec2i, Ctnnb1, Fbn1, Fbxw7, Fstl3, Gpr55, Gpr137, Gpr137b, Iapp, Ifna, Ifnb1, Ifng, Il4, Inpp4b, Inpp5d, Lilra6, Lilrb4a, Lilrb4b, Lrrc17, Mafb, Nf1, Pias3, Pik3r1, Pilrb1, Pira1, Pira2, Pira6, Pira12, Pira13, Pirb, Sfrp1, Tcta, Tjp2, Tmem178, Tnfaip6, Tnfrsf11b, Tob2, Ubash3b
14	neg. reg. of lymphocyte migration	GOBP	GO:2000405	Apod, Cd200, Cd200r1, Il27ra, Lrch1, Ripor2
15	neg. reg. of leukocyte activation	GOBP	GO:0002695	Abr, Adgrf5, Adora2a, Anxa1, Arg1, Arg2, Atm, Axl, Bank1, Bcl6, Bcr, Bmp4, Bpi, Btk, Btla, Btn1a1, Btn2a2, Casp3, Cbfb, Cblb, Ccr2, Cd24a, Cd37, Cd44, Cd74, Cd80, Cd84, Cd86, Cd200, Cd274, Cd276, Cd300a, Cd300lf, Cdkn2a, Ceacam1, Cebpb, Clec4g, Clnk, Cnr1, Cnr2, Crtam, Cst7, Ctla4, Ctsg, Cx3cl1, Cyld, Dlg1, Dlg5, Dtx1, Dusp3, Dusp22, Enpp3, Erbb2, Fas, Fbxo7, Fcgr2b, Fer, Fgl1, Fgl2, Fgr, Flt3, F…
16	neg. reg. of monocyte chemotaxis	GOBP	GO:0090027	Ccn3, Dusp1, Grem1, Nbl1, Slamf8, Slit2
