# Supplementary material for: Molecular reframing of fibroblasts during resolution of arthritis
Source: Research Square preprint supplement (doi:10.21203/rs.3.rs-2668533/v1), 2023-03-21
Supplement: Supplementary file 3 [file b2e8b0159f1a4813affaa879.xlsx]

## Sheet: Suppl. Tab. 4 -Spatial-Gene-Mod
Cell type	Gene module
CD200+/DKK3+	ASPN, DKK3, CILP, COMP, FMOD, HHIP, PRELP, OGN, SFRP1, NDNF, CD200
Endothelial cells	TM4SF1, IGFBP7, SELE, ACKR1, VWF, POSTN, PECAM1, SPRY1, SYNE2, A2M
Pericytes	TAGLN, ACTA2, RGS5, MYH11, RERGL, MAP1B, NOTCH3, LMOD1, AVPR1A, RCAN2
MMP3+/IL6+	MMP3, CXCL1, CXCL8, SPP1, IL1B, IL6, TNF
Lining	CLIC5, ITGA6, CD55, PRG4
ILC2	KLRG1, NMUR1, PTGDR2, CD200R1
ILC3	IL23R, CSF2, CCR6, TNF
Eosenophils	FUT4, CCR3, IL5RA
M2 Macrophages	FOLR2, LILRB5, TREM2, LYVE1
Neutrophils	IFITM2, NAMPT, FTH1, G0S2, H3F3A, S100A11, SRGN, SAT1
CD4+ T cells	IL32, CD52, IL7R, CXCR4, LTB, CD69, PTPRC, CD3E, CD2, TRBC2
CD8+ T cells	CCL5, CCL4, NKG7, IL32, GZMK, GZMA, PTPRC, HCST, CD3E, CD8A
Tregs	CTLA4, FOXP3, IL10
