# Supplementary material for: Molecular reframing of fibroblasts during resolution of arthritis
Source: Research Square preprint supplement (doi:10.21203/rs.3.rs-2668533/v1), 2023-03-21
Supplement: Supplementary file 4 [file b533299c90a1d77a0d01bfbf.xlsx]

## Sheet: Suppl. Tab. 1 - QC-filtering-cr
Library	HTO Multiplex	Sorting	Filtering criteria
			UMI count (>)	Gene count (>)	Mitochondrial ratio (<)	Complexity (>)	Complexity (</=)
R5_STA_r1_ILCs_HC	3 individual animals	viable CD45+ R5+ CD3- TCRb- TCRgd- CD11b- GR-1-	2000	700	0.1	0.825	0.9
R5_STA_r1_ILCs_STA	3 individual animals	viable CD45+ R5+ CD3- TCRb- TCRgd- CD11b- GR-1-	2000	700	0.1	0.825	0.9
R5_STA_r1_ILCs_STA_Il23mc	3 individual animals	viable CD45+ R5+ CD3- TCRb- TCRgd- CD11b- GR-1-	2000	700	0.1	0.825	0.9
R5_STA_r1_Fibroblasts	pooled Fib from 3 animals from above conditions (HC, STA, STA + Il23mc)	viable CD45- GR-1-	1500	800	0.1	0.8	1.0
R5_STA_r2_ILCs	3 individual animal (HTO#1 HC, HTO#2/3 STA)	viable CD45+ R5+ CD3- TCRb- TCRgd- CD11b- GR-1-	2000	700	0.1	0.825	0.9
R5_STA_r2_Fibroblasts	3 individual animal (HTO#1 HC, HTO#2/3 STA)	viable CD45- GR-1-	1500	800	0.1	0.8	1.0
hTNFtg_Il23mc	4 individual animals (HTO#1/2/3 hTNFtg197 + Il23mc, HTO#4 HC)	viable CD45- GR-1-	500	500	0.05	0.8	1.0
hTNFtg_Il23mc_TNFi	4 individual animals (HTO#1/2/3 hTNFtg197 + Il23mc + anti-hTNF, HTO#4 HC)	viable CD45- GR-1-	500	500	0.05	0.8	1.0
hTNFtg_Il23mc_IL-17i	4 individual animals (HTO#1/2/3 hTNFtg197 + Il23mc + anti-mIL-17a, HTO#4 HC)	viable CD45- GR-1-	500	500	0.05	0.8	1.0
hTNFtg_Il23mc_FAP	5 individual animals	viable CD45- CD31- Pdpn+ FAP+	500	500	0.2	0.8	1.0
IL23mc_1	2 different populations (HTO#1 CD45-, HTO#2 CD45+)	viable CD45- CD31- and viable CD45+	1000	550	0.09	0.8	1.0
IL23mc_2	2 different populations (HTO#1 CD45-, HTO#2 CD45+)	viable CD45- CD31- and viable CD45+	1000	550	0.09	0.8	1.0
STIA 2018_HC_d0	none, 3 independent libraries with 1 individual mouse per library	viable CD45- CD31-	1500	750	0.07	0.8	1.0
STIA 2018_PEAK_d9	none, 3 independent libraries with 1 individual mouse per library	viable CD45- CD31-	1500	750	0.07	0.8	1.0
STIA 2018_RESOLVING_d15	none, 3 independent libraries with 1 individual mouse per library	viable CD45- CD31-	1500	750	0.07	0.8	1.0
STIA 2018_RESOLVED_d22	none, 3 independent libraries with 1 individual mouse per library	viable CD45- CD31-	1500	750	0.07	0.8	1.0
