# Supplementary material for: Molecular reframing of fibroblasts during resolution of arthritis
Source: Research Square preprint supplement (doi:10.21203/rs.3.rs-2668533/v1), 2023-03-21
Supplement: Supplementary file 5 [file e3690f41ae9c29b3add6cc6c.xlsx]

## Sheet: Tabelle1
Chanel	Metal	Target (s)	Clone	Supplier	Catalogue
89	Y	DKK3	Polyclonal rabbit	R&D	AF1118
113	In	ACTA2	1A4	Thermo	A5228-100UL
115	In	Pan-Cadherin	Polyclonal rabbit	Thermo	71-7100
115	In	Na/K Pump	EP1845Y	Abcam	ab76020
115	In	PMCA1	EPR12029	Abcam	ab190355
142	Nd	CD19	6OMP31	Fludigm	3142014D
149	Sm	CD11b	EPR1344	Fludigm	3149028D
151	Eu	CD31	EPR3094	Fluidigm	3151025D
152	Sm	CD45	D9M8I	Fluidigm	3152018D
159	Tb	CD68	KP1	Fludigm	3159035D
164	Dy	Podoplanin	D2-40	Biolegend	916606
167	Er	Thy1	polyclonal sheep	R&D	AF2067
168	Er	CD127	EPR2955(2)	Fludigm	3168026D
170	Er	CD3	polyclonal	Fluidigm	3170019D
171	Yb	CD200	333	Thermo	MA5-29097
173	Yb	FAP	polyclonal sheep	R & D systems	AF3715
176	Yb	Histone H3	D1H2	Fluidigm	3176023D
191	Ir	Iridium Intercalator		Fluidigm	201192A
193	Ir	Iridium Intercalator		Fluidigm	201192A
195	Pt	ICSK1	TIS-00001	Fluidigm
196	Pt	ICSK2	TIS-00001	Fluidigm
198	Pt	ICSK3	TIS-00001	Fluidigm
